# Supplementary material for: Feasibility study of an electrochemical hydrogen looping system for indirect ocean capture
Source: Royal Society of Chemistry journal article supplement (doi:10.1039/d4gc05943c), 2025-01-01
Supplement: d4gc05943c1.pdf [file d4gc05943c1.pdf]

## Supporting information

### Feasibility study of an electrochemical hydrogen looping system for indirect ocean capture

Siebe De Ley<sup>a</sup>, Sven Arnouts<sup>a</sup>, Kevin Van Daele<sup>a</sup>, Jonas Hereijgers<sup>a</sup>, Tom Breugelmans<sup>a,\*</sup>

<sup>a</sup> Applied Electrochemistry and Catalysis (ELCAT), University of Antwerp, 2610 Wilrijk, Belgium

\* Corresponding author – Tom.Breugelmans@uantwerpen.be

#### Supporting note 1:

Figure S1 shows the Bjerrum plot for the carbon concentrations in seawater. This graph shows the pH dependency of the carbonate species and allowed us to establish the degassing method used before measuring the samples with TOC analysis. Based on pH measurements, the theoretical capture efficiency could be calculated, which was utilized to confirm the TOC measurements. Using this strategy a degassing method was established in which a 225 mL sample was collected and sparged with argon gas for 12 minutes, before stating the TOC analysis.

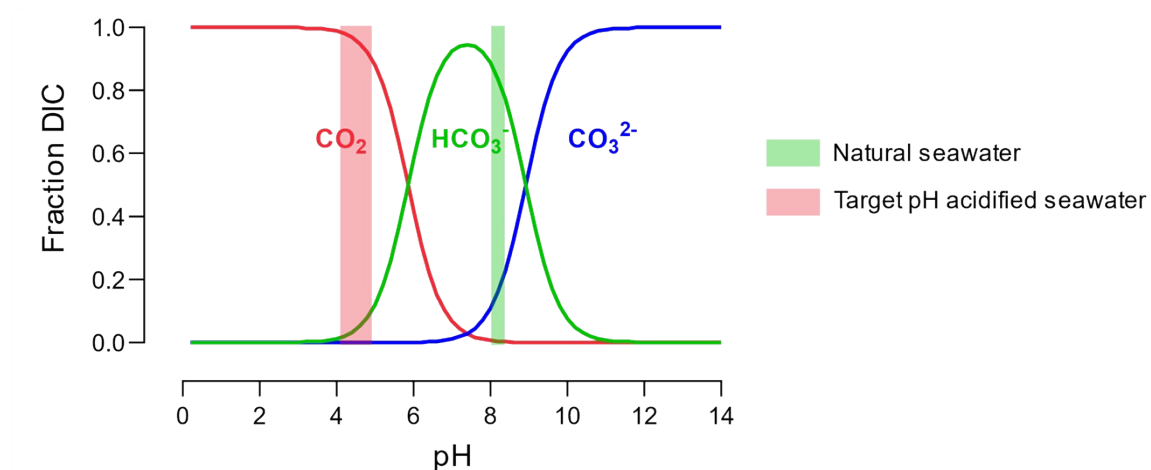

Figure S1. Bjerrum plot of the fraction of carbonate, bicarbonate and carbon dioxide as a function of the pH in synthetic seawater

Table S1. Overview and comparison of the energy consumption of all indirect ocean capture technologies with the most common DAC technologies.

| Technology             | Energy consumption [kJ/mol CO <sub>2</sub> ] | Theoretical cell voltage [V] | Ref.       |
|------------------------|----------------------------------------------|------------------------------|------------|
| EHL                    | 77.5                                         | 0.48                         | This work  |
| E-CEM                  | 3170                                         | 1.73                         | [1-3]      |
| BPMED-1                | 220                                          | 0.83                         | [4]        |
| BPMED-2                | 145                                          | 0.36                         | [5]        |
| DAC (Liquid scrubbing) | 33 – 67                                      | n/a                          | [6-13]     |
| DAC (Solid sorbent)    | 18 – 62                                      | n/a                          | [6, 14-20] |

### Supporting note 2:

It needs to be mentioned that for DAC technologies extra heat energy is required to complete the capture. For liquid scrubbing and solid sorbent DAC this respectively accounts for 230 – 2124 kJ/mol CO<sub>2</sub> and 176 – 519 kJ/mol CO<sub>2</sub>.

### Supporting note 3:

The theoretical cell potential of all indirect ocean capture technologies were calculated below:

#### (1) EHL

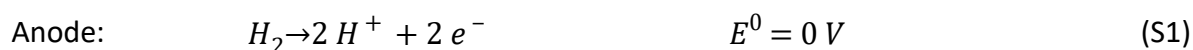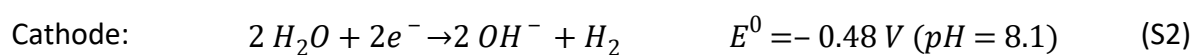

$$E_{anode} - E_{cathode} = 0 V - (-0.48 V) = 0.48 V \quad (S3)$$

#### (2) BPMED-1

The theoretical cell potential of BPMED is calculated by the pH difference between the acidified and basified seawater, using the Nernstian voltage (0.059·ΔpH). [4]

$$0.059 \cdot (14 - 0) = 0.83 \text{ V} \quad (\text{S4})$$

### (3) BPMED-2

The calculation of the theoretical potential for the improved BPMED is identical to the one for BPMED-1. [21]

$$0.059 \cdot (10 - 4.5) = 0.3245 \text{ V} \quad (\text{S5})$$

### (4) E-CEM [1]

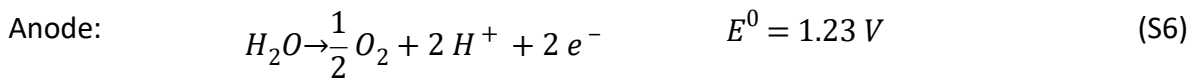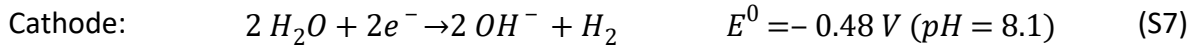

$$E_{anode} - E_{cathode} = 1.23 \text{ V} - (-0.48 \text{ V}) = 1.71 \text{ V} \quad (\text{S8})$$

### Supporting note 4:

The electrochemical energy consumption with the most efficient settings was calculated below:

$$EEC = \frac{I \cdot U \cdot t}{Q \cdot t \cdot C \cdot \eta} \quad (\text{S9})$$

$$EEC = \frac{0.032 \text{ A} \cdot 0.765 \text{ V} \cdot 1 \text{ h}}{15 \frac{\text{mL}}{\text{min}} \cdot 0.06 \frac{\text{min} \cdot \text{L}}{\text{h} \cdot \text{mL}} \cdot 1 \text{ h} \cdot 0.002538 \frac{\text{mol}}{\text{L}} \cdot 52.20\%} = 77.5 \frac{\text{kJ}}{\text{mol CO}_2} \quad (\text{S10})$$

### Supporting note 5:

The capture efficiency used in the calculation in supporting note 4 was calculated below:

$$\eta = \frac{C_{\text{Carbon before acidification}} - C_{\text{Carbon after acidification}}}{C_{\text{Carbon before acidification}}} \quad (\text{S11})$$

$$\eta = \frac{0.002538 - 0.001213}{0.002538} = 52.20\% \quad (S12)$$

#### **Supporting note 6:**

Extra SEM EDS images from the same NaEM membrane as Figure 7 but taken from the side of the membrane facing the middle compartment. The same membrane scaling is established in figure S2a, really showcasing the transport of hydroxyl ions in the opposite direction, even though it is a cation exchange membrane. This property of anion transport allows for the membranes to scale not only from the side facing the cathode, but also from the opposite side and probably the core of the membrane as well. Figure S2b shows again the NaEM membrane facing the middle compartment during a four hour experiment in which the optimal washing step (0.5 M HCl for 8 minutes at a washing flow rate of 45 mL min<sup>-1</sup>) was executed. It is clear for the electron image and the elemental map that the salt precipitation at the surface layer of the membrane has been washed.

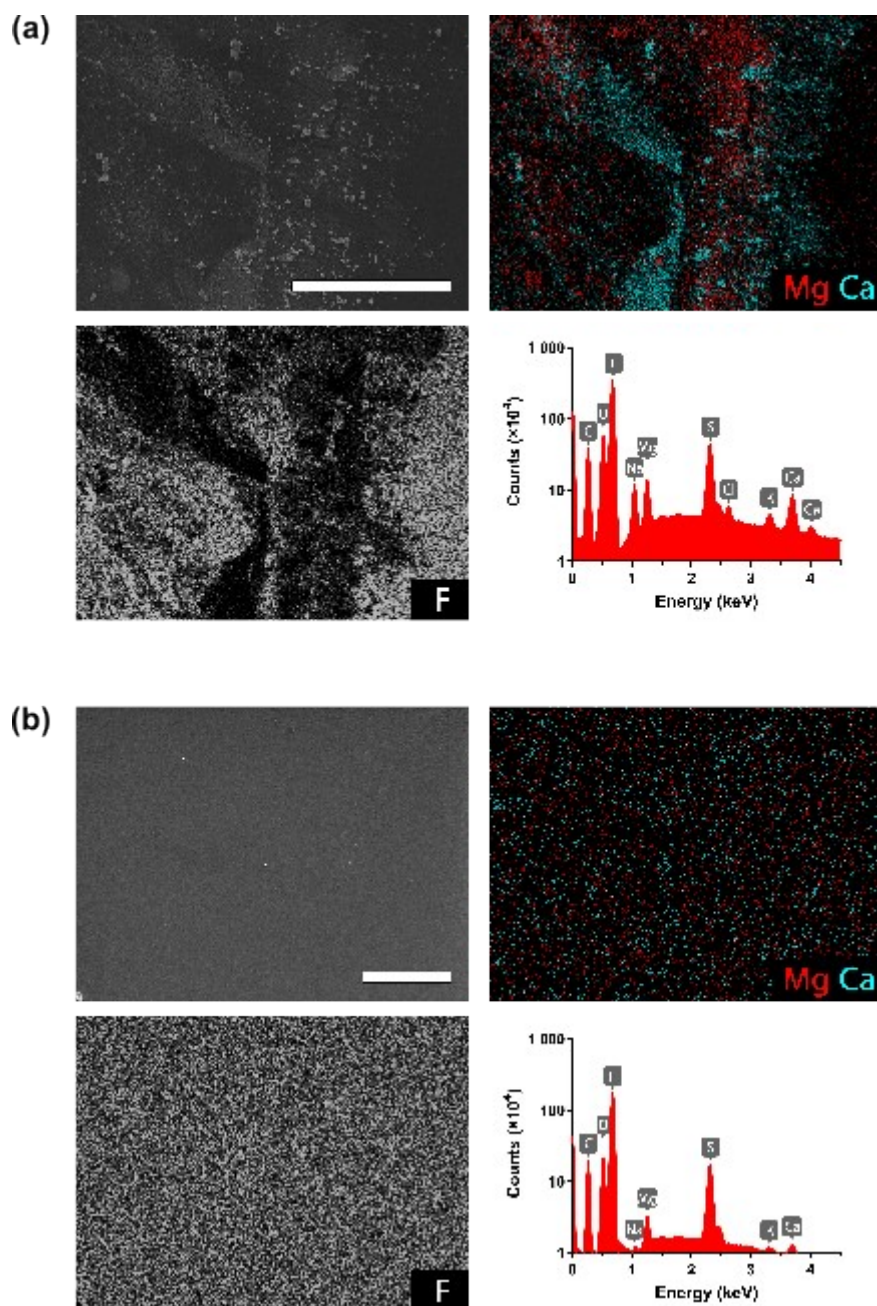

Figure S2. Secondary electron images, elemental maps and EDS spectra of (a) a Nafion™ 117 membrane imaged from the side of the middle compartment after 4 hours of operation without washing steps and (b) a Nafion™ 117 membrane imaged from the side of the middle compartment after four hours of operation including wash steps under the optimal conditions. All scale bars correspond to 250  $\mu\text{m}$ . Experiments with these membranes were carried out at 5  $\text{mA cm}^{-2}$  and with a flow rate of 25  $\text{mL min}^{-1}$ .

### Supporting note 7:

Figure S3 depicts the visual establishing of the salt precipitation issues after four hours of operation at a current density of 5  $\text{mA cm}^{-2}$  and a RSW flow rate of 25  $\text{mL min}^{-1}$  without any mitigation strategy. Figure S3a shows the salt precipitation in the flow field on which the catalyst substrate rests. Near clogging of a number of flow channels can be visually established. Figure S3b and c respectively show the salt precipitation on the membrane and

on the cathode Pt gauze. The latter is clearly covered in salts which led to the decrease of active surface area, leading to an increase in cell voltage. Identically the blocking of transport pathways through the membrane because of the presence of salt precipitates caused an increased ionic resistance of the membrane, impacting the cell voltage in a negative manner.

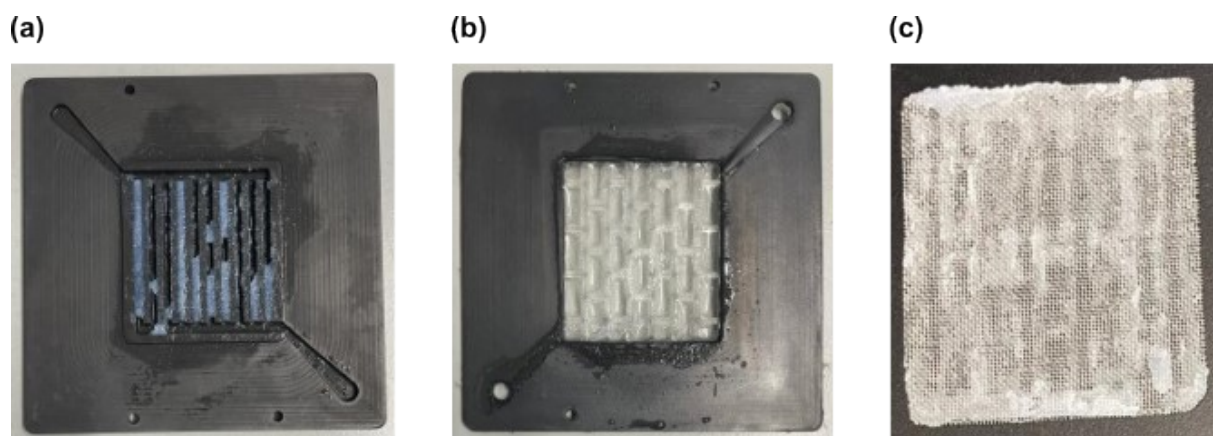

Figure S3. Salt precipitation after four hours of operation at a current density of  $5 \text{ mA cm}^{-2}$  and a RSW flow rate of  $25 \text{ mL min}^{-1}$  in (a) the flow channels of the cathodic bipolar plate (b) on the NaEM and (c) on the cathode (Pt gauze)

## References

- [1] H. D. Willauer, F. DiMascio, D. R. Hardy, M. K. Lewis, and F. W. Williams, "Development of an Electrochemical Acidification Cell for the Recovery of CO<sub>2</sub> and H<sub>2</sub> from Seawater," *Industrial & engineering chemistry research*, vol. 50, no. 17, pp. 9876-9882, 2011.
- [2] H. D. Willauer, F. DiMascio, D. R. Hardy, M. K. Lewis, and F. W. Williams, "Development of an Electrochemical Acidification Cell for the Recovery of CO<sub>2</sub> and H<sub>2</sub> from Seawater II. Evaluation of the Cell by Natural Seawater," *Industrial & Engineering Chemistry Research*, vol. 51, no. 34, pp. 11254-11260, 2012/08/29 2012, doi: 10.1021/ie301006y.
- [3] H. D. Willauer, F. DiMascio, D. R. Hardy, and F. W. Williams, "Development of an Electrolytic Cation Exchange Module for the Simultaneous Extraction of Carbon Dioxide and Hydrogen Gas from Natural Seawater," *Energy & Fuels*, vol. 31, no. 2, pp. 1723-1730, 2017/02/16 2017, doi: 10.1021/acs.energyfuels.6b02586.
- [4] M. D. Eisaman, K. Parajuly, A. Tuganov, C. Eldershaw, N. Chang, and K. A. Littau, "CO<sub>2</sub> extraction from seawater using bipolar membrane electrodialysis," *Energy & Environmental Science*, vol. 5, no. 6, pp. 7346-7352, 2012.
- [5] I. A. Digdaya *et al.*, "A direct coupled electrochemical system for capture and conversion of CO<sub>2</sub> from oceanwater," *Nature Communications*, vol. 11, no. 1, p. 4412, 2020/09/04 2020, doi: 10.1038/s41467-020-18232-y.
- [6] F. Sabatino, A. Grimm, F. Gallucci, M. van Sint Annaland, G. J. Kramer, and M. Gazzani, "A comparative energy and costs assessment and optimization for direct air capture technologies," *Joule*, vol. 5, no. 8, pp. 2047-2076, 2021/08/18/ 2021, doi: <https://doi.org/10.1016/j.joule.2021.05.023>.
- [7] R. Socolow *et al.*, "Direct air capture of CO<sub>2</sub> with chemicals: a technology assessment for the APS Panel on Public Affairs," 2011.
- [8] F. Barzagli and F. Mani, "Direct CO<sub>2</sub> air capture with aqueous 2-(ethylamino)ethanol and 2-(2-aminoethoxy)ethanol: 13C NMR speciation of the absorbed solutions and study of the sorbent regeneration improved by a transition metal oxide catalyst," *Inorganica Chimica Acta*, vol. 518, p. 120256, 2021/04/01/ 2021, doi: <https://doi.org/10.1016/j.ica.2021.120256>.
- [9] G. Realmonte *et al.*, "An inter-model assessment of the role of direct air capture in deep mitigation pathways," *Nature communications*, vol. 10, no. 1, p. 3277, 2019.
- [10] A. Kiani, M. Lejeune, C. Li, J. Patel, and P. Feron, "Liquefied synthetic methane from ambient CO<sub>2</sub> and renewable H<sub>2</sub>-A technoeconomic study," *Journal of Natural Gas Science and Engineering*, vol. 94, p. 104079, 2021.
- [11] D. W. Keith, G. Holmes, D. S. Angelo, and K. Heidel, "A process for capturing CO<sub>2</sub> from the atmosphere," *Joule*, vol. 2, no. 8, pp. 1573-1594, 2018.
- [12] F. Barzagli, C. Giorgi, F. Mani, and M. Peruzzini, "Screening Study of Different Amine-Based Solutions as Sorbents for Direct CO<sub>2</sub> Capture from Air," *ACS Sustainable Chemistry & Engineering*, vol. 8, no. 37, pp. 14013-14021, 2020/09/21 2020, doi: 10.1021/acssuschemeng.0c03800.
- [13] A. Kiani, K. Jiang, and P. Feron, "Techno-economic assessment for CO<sub>2</sub> capture from air using a conventional liquid-based absorption process," *Frontiers in Energy Research*, vol. 8, p. 92, 2020.
- [14] G. Leonzio, P. S. Fennell, and N. Shah, "Analysis of Technologies for Carbon Dioxide Capture from the Air," *Applied Sciences*, vol. 12, no. 16, p. 8321, 2022. [Online]. Available: <https://www.mdpi.com/2076-3417/12/16/8321>.
- [15] K. S. Lackner, "Capture of carbon dioxide from ambient air," *The European Physical Journal Special Topics*, vol. 176, no. 1, pp. 93-106, 2009.
- [16] S. Block and P. Viebahn, "Direct Air Capture (DAC) in Germany: resource implications of a possible rollout in 2045," in *Annales des Mines-Responsabilite et environnement*, 2022, no. 1: Cairn/Softwin, pp. 78-82.

- [17] C.-I. Hou *et al.*, "Integrated direct air capture and CO<sub>2</sub> utilization of gas fertilizer based on moisture swing adsorption," *J. Zhejiang Univ., Sci., A*, vol. 18, no. 10, pp. 819-830, 2017.
- [18] C. van der Giesen, C. J. Meinrenken, R. Kleijn, B. Sprecher, K. S. Lackner, and G. J. Kramer, "A Life Cycle Assessment Case Study of Coal-Fired Electricity Generation with Humidity Swing Direct Air Capture of CO<sub>2</sub> versus MEA-Based Postcombustion Capture," *Environmental Science & Technology*, vol. 51, no. 2, pp. 1024-1034, 2017/01/17 2017, doi: 10.1021/acs.est.6b05028.
- [19] T. Wang, K. S. Lackner, and A. B. Wright, "Moisture-swing sorption for carbon dioxide capture from ambient air: a thermodynamic analysis," *Physical Chemistry Chemical Physics*, vol. 15, no. 2, pp. 504-514, 2013.
- [20] W. K. Shi, Y. Ji, X. J. Zhang, M. X. Fang, T. Wang, and L. Jiang, "Understandings on design and application for direct air capture: From advanced sorbents to thermal cycles," *Carbon Capture Science & Technology*, vol. 7, p. 100114, 2023/06/01/ 2023, doi: <https://doi.org/10.1016/j.ccst.2023.100114>.
- [21] R. Sharifian, L. Boer, R. Wagterveld, and D. Vermaas, "Oceanic carbon capture through electrochemically induced in situ carbonate mineralization using bipolar membrane," *Chemical Engineering Journal*, vol. 438, p. 135326, 2022.
